# Supplementary material for: Performance and Mechanism of Sulfathiazole Adsorption by Magnetic Biochar: Promoting Effect of Co-existing Polystyrene and Simultaneous Removal
Source: Research Square preprint supplement (doi:10.21203/rs.3.rs-7974902/v1), 2025-11-18
Supplement: Supplementary file 1 [file 2b1de2750a0eec7409937920.docx]

SUPPLEMENTARY

**Performance and Mechanism of Sulfathiazole Adsorption by Magnetic Biochar: Promoting Effect of Co-existing Polystyrene and Simultaneous Removal**

**Xilong Zhang a, Zihan Tang a, Fei Liu a, Xiuping Hong a, Yingying Zhang a, Ting Fang b,*, Rongjian Fan c, Xin Wang a,***

a College of Life Sciences, Huaibei Normal University, Huaibei 235000, China

b Fisheries Research Institute, Anhui Academy of Agricultural Sciences, Hefei 230000, China

c Chongqing Xianjia Environmental Protection Technology Co., Ltd., Chongqing 400000, China

*Corresponding authors. E-mail addresses: wangxinhello@126.com (X. Wang), fangting_candy@163.com (T. Fang).

Figure S1 The EDS spectra image analysis of PS.

Figure S2 Surface electrostatic potential of the STZ molecule.

Figure S3 Surface electrostatic potential of the PS molecule.

Table S1 The fitting results of pseudo-first-order model, pseudo-second-order model, Elovich model and particle internal diffusion model.

Table S2 The fitting results of Langmuir model, Freundlich model, Sips.

Table S3 PS, STZ HOMO, LUMO energy and △E.

Table S4 Fukui index distribution for electrophilic attack (f−),nucleophilic (f+), and radical attack( f0) for STZ.

Table S5 Fukui index distribution for electrophilic attack (f−),nucleophilic (f+), and radical attack( f0) for PS.


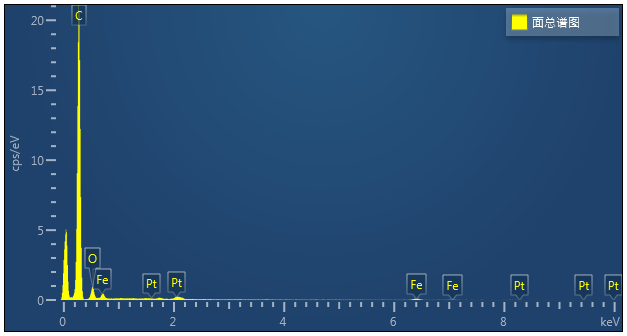


**Figure S1** The EDS spectra image analysis of PS.

**Figure S2** Surface electrostatic potential of the STZ molecule.
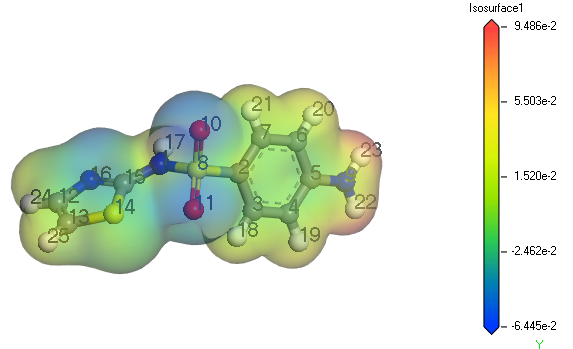


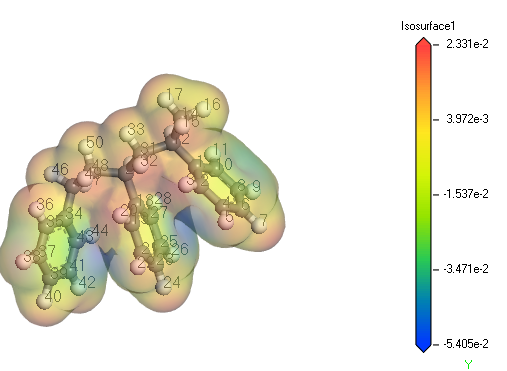


**Figure S3** Surface electrostatic potential of the PS molecule.

**Table S1** The fitting results of pseudo-first-order model, pseudo-second-order model, Elovich model and particle internal diffusion model.

| Sample | Pseudo-first-order model | | | Pseudo-second-order model | | | Elovich model | | | Intra-particle diffusion model | | |
| --- | --- | --- | --- | --- | --- | --- | --- | --- | --- | --- | --- | --- |
| Qe | kf | R2 | Qe | ks | R2 | α | 1/β | R2 | k1 | k2 | k3 |
| mg·g−1 | min−1 | mg·g−1 | g·(mg·min)−1 | mg·(g min)−1 | g·mg−1 | mg·(g·t0.5)−1 | mg·(g·t0.5)−1 | mg·(g·t0.5)−1 |
| PS-S | 951.09 | 1.49E-02 | 0.9868 | 1175.61 | 1.32E-05 | 0.9779 | 29.059 | 0.00323 | 0.95942 | 81.00143 | 76.30584 | 0.46976 |
| PS-C | 957.11 | 5.42E-02 | 0.9787 | 1041.24 | 7.90E-05 | 0.9859 | 313.969 | 0.00606 | 0.9876 | 118.5186 | 49.93691 | 0.7992 |
| STZ-S | 40.00 | 2.25E-01 | 0.9993 | 40.62 | 1.89E-02 | 0.9998 | 2.45E+12 | 0.82966 | 0.997 | 7.42218 | 0.15819 | 0.04355 |
| STZ-C | 42.23 | 2.82E-01 | 0.9990 | 42.68 | 3.08E-02 | 0.9998 | 2.46E+19 | 1.17372 | 0.99954 | 7.86063 | 0.18746 | -0.02284 |

**Table S2** The fitting results of Langmuir model, Freundlich model, Sips.

| Sample | Langmuir model | | | Freundlich model | | | Sips | | | |
| --- | --- | --- | --- | --- | --- | --- | --- | --- | --- | --- |
| Qmax | KL | R2 | KF | 1/n | R2 | Qmax | KS | n | R2 |
| mg·g−1 | L·mg-1 | (mg/g)/(mg/L)n | mg·g−1 | L·mg-1 |
| PS-S | 2068.80 | 0.03432 | 0.9702 | 225.96951 | 0.42247 | 0.9563 | 2625.23 | 0.74941 | 0.74941 | 0.9732 |
| PS-C | 1856.17 | 0.015621 | 0.9731 | 450.89875 | 0.31413 | 0.8965 | 1928.39 | 0.9083 | 0.9083 | 0.9613 |
| STZ-S | 170.98 | 0.1964 | 0.9578 | 38.9968 | 0.40239 | 0.8813 | 159.63 | 0.23072 | 1.16994 | 0.9479 |
| STZ-C | 157.79 | 1.30569 | 0.9749 | 66.39959 | 0.2832 | 0.8237 | 148.11 | 1.90636 | 1.8544 | 0.9938 |

| molecule | Energy (Ha) | | △E | |
| --- | --- | --- | --- | --- |
|  | HOMO | LUMO | Ha | eV |
| PS | -0.182217 | -0.021075 | 0.161142 | 4.38 |
| STZ | -0.18215 | -0.107694 | 0.074456 | 2.03 |

**Table S3** PS, STZ HOMO, LUMO energy and △E.

| STZ | | f- | f+ | f0 |
| --- | --- | --- | --- | --- |
| Number | atom | Hirshfeld | Hirshfeld | Hirshfeld |
| 1 | N | 0.054 | 0.057 | 0.055 |
| 2 | C | 0.026 | -0.004 | 0.011 |
| 3 | C | 0.035 | 0.012 | 0.023 |
| 4 | C | 0.038 | 0.022 | 0.03 |
| 5 | C | 0.048 | 0.022 | 0.035 |
| 6 | C | 0.037 | 0.022 | 0.029 |
| 7 | C | 0.04 | 0.008 | 0.024 |
| 8 | S | 0.07 | 0.014 | 0.042 |
| 9 | N | 0.049 | 0.033 | 0.041 |
| 10 | O | 0.097 | 0.073 | 0.085 |
| 11 | O | 0.101 | 0.036 | 0.069 |
| 12 | C | 0.037 | 0.1 | 0.068 |
| 13 | C | 0.041 | 0.124 | 0.082 |
| 14 | S | 0.031 | 0.119 | 0.075 |
| 15 | C | -0.001 | 0.074 | 0.037 |
| 16 | N | 0.039 | 0.08 | 0.059 |
| 17 | H | 0.05 | 0.03 | 0.04 |
| 18 | H | 0.022 | 0.008 | 0.015 |
| 19 | H | 0.028 | 0.016 | 0.022 |
| 20 | H | 0.028 | 0.016 | 0.022 |
| 21 | H | 0.023 | 0.005 | 0.014 |
| 22 | H | 0.027 | 0.017 | 0.022 |
| 23 | H | 0.028 | 0.017 | 0.022 |
| 24 | H | 0.027 | 0.048 | 0.037 |
| 25 | H | 0.026 | 0.053 | 0.039 |

**Table S4** Fukui index distribution for electrophilic attack (f−),nucleophilic (f+), and radical attack( f0) for STZ.

**Table S5** Fukui index distribution for electrophilic attack (f−), nucleophilic (f+), and radical attack (f0) for PS.

| PS | | f- | f+ | f0 |
| --- | --- | --- | --- | --- |
| Number | atom | Hirshfeld | Hirshfeld | Hirshfeld |
| 1 | C | 0.022 | 0.029 | 0.025 |
| 2 | C | 0.016 | 0.047 | 0.032 |
| 3 | H | 0.011 | 0.024 | 0.017 |
| 4 | H | 0.016 | 0.025 | 0.021 |
| 5 | C | 0.015 | 0.021 | 0.018 |
| 6 | H | 0.04 | 0.044 | 0.042 |
| 7 | H | 0.021 | 0.028 | 0.024 |
| 8 | C | 0.026 | 0.055 | 0.041 |
| 9 | C | 0.019 | 0.031 | 0.025 |
| 10 | C | 0.018 | 0.022 | 0.02 |
| 11 | H | 0.015 | 0.02 | 0.017 |
| 12 | C | 0.004 | 0.003 | 0.004 |
| 13 | H | 0.009 | 0.01 | 0.01 |
| 14 | C | 0.012 | 0.009 | 0.011 |
| 15 | H | 0.009 | 0.008 | 0.008 |
| 16 | H | 0.013 | 0.011 | 0.012 |
| 17 | H | 0.015 | 0.017 | 0.016 |
| 18 | C | 0.043 | 0.03 | 0.036 |
| 19 | C | 0.031 | 0.052 | 0.042 |
| 20 | H | 0.019 | 0.027 | 0.023 |
| 21 | H | 0.026 | 0.029 | 0.027 |
| 22 | C | 0.022 | 0.023 | 0.023 |
| 23 | H | 0.058 | 0.045 | 0.051 |
| 24 | C | 0.028 | 0.028 | 0.028 |
| 25 | C | 0.032 | 0.057 | 0.044 |
| 26 | C | 0.024 | 0.031 | 0.027 |
| 27 | H | 0.028 | 0.02 | 0.024 |
| 28 | C | 0.02 | 0.018 | 0.019 |
| 29 | H | 0.007 | 0.003 | 0.005 |
| 30 | C | 0.012 | 0.009 | 0.01 |
| 31 | H | 0.01 | 0.006 | 0.008 |
| 32 | H | 0.007 | 0.005 | 0.006 |
| 33 | H | 0.016 | 0.017 | 0.017 |
| 34 | H | 0.028 | 0.004 | 0.016 |
| 35 | C | 0.026 | 0.02 | 0.023 |
| 36 | C | 0.018 | 0.013 | 0.015 |
| 37 | H | 0.029 | 0.019 | 0.024 |
| 38 | H | 0.022 | 0.015 | 0.018 |
| 39 | C | 0.049 | 0.02 | 0.034 |
| 40 | H | 0.025 | 0.016 | 0.02 |
| 41 | C | 0.02 | 0.018 | 0.019 |
| 42 | C | 0.017 | 0.012 | 0.014 |
| 43 | C | 0.016 | 0 | 0.008 |
| 44 | H | 0.01 | 0.003 | 0.007 |
| 45 | C | 0.008 | 0.004 | 0.006 |
| 46 | H | 0.023 | 0.017 | 0.02 |
| 47 | C | 0.01 | 0.006 | 0.008 |
| 48 | H | 0.012 | 0.006 | 0.009 |
| 49 | H | 0.008 | 0.006 | 0.007 |
| 50 | H | 0.019 | 0.016 | 0.017 |
