# Supplementary figures and images for: Performance and Mechanism of Sulfathiazole Adsorption by Magnetic Biochar: Promoting Effect of Co-existing Polystyrene and Simultaneous Removal
Source: Research Square preprint supplement (doi:10.21203/rs.3.rs-7974902/v1), 2025-11-18

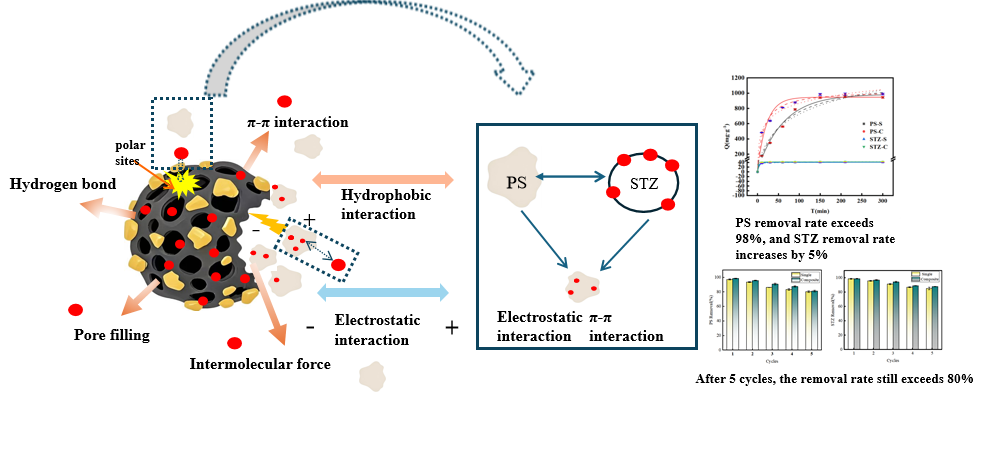

Supplement: Supplementary file 2 [file 33cb1d6c18fab0184034b89a.docx]
